# Supplementary material for: Structure of the mammalian adenine DNA glycosylase MUTYH: insights into the base excision repair pathway and cancer
Source: PubMed Central journal article supplement — Nucleic Acids Res. 2021 Jun 18;49(12):7154–63. doi: 10.1093/nar/gkab492 (PMC8266592; doi:10.1093/nar/gkab492), 2021-06-18
Supplement: gkab492_supplemental_file.pdf [file gkab492_supplemental_file.pdf]

## Supplementary Data

### **Structure of the mammalian adenine DNA glycosylase MUTYH: insights into the base excision repair pathway and cancer.**

Teruya Nakamura<sup>1,2,\*</sup>, Kohtaro Okabe<sup>1</sup>, Shogo Hirayama<sup>1</sup>, Mami Chirifu<sup>1</sup>, Shinji Ikemizu<sup>1</sup>, Hiroshi Morioka<sup>1</sup>, Yusaku Nakabeppu<sup>3</sup> and Yuriko Yamagata<sup>1,4</sup>

<sup>1</sup> Graduate School of Pharmaceutical Sciences, Kumamoto University, 5-1 Oehonmachi, Chuo-ku, Kumamoto, 862-0973 Kumamoto, Japan

<sup>2</sup> Priority Organization for Innovation and Excellence, Kumamoto University, 5-1 Oehonmachi, Chuo-ku, Kumamoto, 862-0973 Kumamoto, Japan

<sup>3</sup> Division of Neurofunctional Genomics, Department of Immunobiology and Neuroscience, Medical Institute of Bioregulation, Kyushu University, 3-1-1 Maidashi, Higashi-ku, Fukuoka 812-8582, Japan

<sup>4</sup> Shokei University and Shokei University Junior College, 2-6-78, Kuhonji, Chuo-ku, Kumamoto, 862-8678 Kumamoto, Japan

\* To whom correspondence should be addressed. Tel: +81-96-371-4638; Fax: +81-96-371-4638; Email: tnaka@gpo.kumamoto-u.ac.jp

#### **Table of contents**

Table S1

Figures S1 to S8

References

**Table S1.** Data collection and refinement statistics.

|                                                         | MUTYH-DNA complex                                      |                                                        |                                                        | CTD-PCNA                                        |
|---------------------------------------------------------|--------------------------------------------------------|--------------------------------------------------------|--------------------------------------------------------|-------------------------------------------------|
|                                                         | Form I                                                 | Form II                                                | Phasing                                                | complex                                         |
| <b>Data collection</b>                                  |                                                        |                                                        |                                                        |                                                 |
| Wavelength (Å)                                          | 1.0                                                    | 0.98                                                   | 1.7                                                    | 0.98                                            |
| Space group                                             | <i>I</i> 222                                           | <i>I</i> 222                                           | <i>I</i> 222                                           | <i>P</i> 6 <sub>3</sub>                         |
| Unit-cell lengths (Å)                                   | <i>a</i> = 74.3, <i>b</i> =<br>107.2, <i>c</i> = 156.4 | <i>a</i> = 71.7, <i>b</i> =<br>108.5, <i>c</i> = 158.5 | <i>a</i> = 72.1, <i>b</i> =<br>108.8, <i>c</i> = 158.5 | <i>a</i> = <i>b</i> = 87.8, <i>c</i><br>= 124.4 |
| Resolution range (Å)                                    | 46.89-2.45<br>(2.49-2.45)                              | 42.53-1.97<br>(2.00-1.97)                              | 42.53-2.75<br>(2.80-2.75)                              | 36.40-2.70<br>(2.77-2.70)                       |
| No. of observed reflections                             | 146,029                                                | 290,882                                                | 223,653                                                | 157,014                                         |
| No. of unique reflections                               | 23,331                                                 | 43,985                                                 | 30,921                                                 | 14,970                                          |
| Completeness (%)                                        | 99.8 (97.2)                                            | 99.4 (98.8)                                            | 98.8 (97.9)                                            | 99.9 (100)                                      |
| <i>R</i> <sub>merge</sub> (%)                           | 9.4 (61.9)                                             | 5.3 (57.6)                                             | 7.7 (59.2)                                             | 4.3 (119.1)                                     |
| < <i>I</i> /σ <i>I</i> >                                | 23.6 (1.5)                                             | 33.1 (1.9)                                             | 54.1 (9.3)                                             | 29.9 (2.3)                                      |
| <b>Refinement statistics</b>                            |                                                        |                                                        |                                                        |                                                 |
| Resolution range (Å)                                    | 46.89-2.45                                             | 42.53-1.97                                             |                                                        | 36.40-2.70                                      |
| No. of reflections used                                 | 23,315                                                 | 43,974                                                 |                                                        | 14,938                                          |
| Completeness (%)                                        | 99.6                                                   | 99.2                                                   |                                                        | 99.9                                            |
| <i>R</i> <sub>work</sub> / <i>R</i> <sub>free</sub> (%) | 19.8/22.1                                              | 17.8/19.7                                              |                                                        | 23.5/28.6                                       |
| R.m.s.d. in bonds (Å)                                   | 0.003                                                  | 0.006                                                  |                                                        | 0.002                                           |
| R.m.s.d. in angles (deg.)                               | 0.585                                                  | 0.832                                                  |                                                        | 0.498                                           |
| Ramachandran plot                                       |                                                        |                                                        |                                                        |                                                 |
| Favoured (%)                                            | 97.0                                                   | 97.8                                                   |                                                        | 91.9                                            |
| Allowed (%)                                             | 3.0                                                    | 2.2                                                    |                                                        | 8.1                                             |

```

mouse -----MKKLQASVRS-HKKQPANHKRRRTRALSSSQAKPSSLDGLAKQKRE
human MTPLVSRLSRLWAIMRKPRAAVGSGHRKQAAASQEGRQKHAKNNSQAKPSACDGLARQPEE
b.st -----MTRETER

                                [4Fe-4S]                6-helix barrel      :::: ..

mouse ELLQASVSPYHLFSDVADVTAFRSNLLSWYDQEKRDLPWRNLAKEEANSDRRAYAVWVSE
human VVLQASVSSYHLFRDVAEVTAFRGSLLSWYDQEKRDLPWRRRAEDEMDDRDAYAVWVSE
b.st -----FPAREFQRDLLDFARERRDLPWRKDR-----DPYKVVWVSE
          .  * : .**.* : :*:*****          . * *****

mouse VMLQQTQVATVIDYYTRWMQKPKLQDLASASLEEVNQLWSQLGYYSRGRRLQEGARKVV
human VMLQQTQVATVINYYTGWMQKPTLQDLASASLEEVNQLWAGLGYYSRGRRLQEGARKVV
b.st VMLQQTRVETVIPYFEQFIDRFPTLEALADADEVLKAWEGLGYYSRVRNLHAAVKEVK
*****:* *** * : ::::*.* : **.* : ** : * ***** *.* : .:::*

mouse EELGGHMPRTAETLQQLLPVGRYTAGAIASIAFDQVTGVVDGNVLRVLCRVRAIGADPT
human EELGGHMPRTAETLQQLLPVGRYTAGAIASIAFGQATGVVDGNVARVLCRVRAIGADPS
b.st TRYGGKVPDDPDEFSR-LKGVGPYTVGAVLSLAYGVPEPAVDGNVMRVL SRLFLVTDDIA
          . **::* . : :: : * *** **.* : :*:. .***** **.* : : * :

mouse STLVSHHLWNLAQQLVDPARPGDFNQAAMELGATVCTPQRPLCSHCVPVQSLCRAYQRVQR
human STLVSQQLWGLAQQLVDPARPGDFNQAAMELGATVCTPQRPLCSQCPVESLCRARQRVEQ
b.st KPSTRKRFEQIVREIMAYENPGAFNEALIELGALVCTPRRPSCLLCPVQAYCQAFQAEQ--
          .. . :: : : :: : . ** **.* : ***** **.* * **.* : *.* .

IDC  mouse GQLSA---LPGRPDIEECALNTRQCQLCLTSSSPWDPSMGVANFPRKASRRPPREEYSAT
human EQLLASGSLSGSPDVEECAPNTGQCHLCLPPSEPDQTLGVVNFPRKASRKPPREESSAT
b.st -----VAEELPVKMKKTAVKQVPLAV
          . : : * * . : . : : * .

                                CTD

mouse CVVEQPGAIGGPLVLLVQRPDSGLLAGLWEFSPVTLEPSEQHQHKALLQELQRWCGPLPA
human CVLEQPGALG-AQILLVQRPNSGLLAGLWEFSPVTWEPSEQLQRKALLQELQRWAGPLPA
b.st AVLADDE----GRVLI RKR DSTGLLANLWEFSPCETDGA--DGKEKLEQM-VGEQYGLQV
          . * : : : * : : * .*****.***** : : : * * * .

mouse IRLQHLGEVIHIFSHIKLTYQVYSLALD-QAPASTAPPGARWLTWEEFCNAAVSTAMKKV
human THLRHLGEVVHTFSHIKLTYQVYGLALEGQTPVTTVPPGARWLTQEEFHTAAVSTAMKKV
b.st ELTEPIVSFEHAFSHLVNQLTVFPGRL---VHGGPVEEPYRLAPEDELKAYFPVSHQRV
          . : .. * *** : * : * . . . * . : : * . . . : : *

                                PIP

mouse FRMYEDHRQGTRKGSKRQVCPSSRKKPSLGQQVLDTFQRIPTDKP--NSTTQ
human FRVYQQQPGTCMGSKRQVSSPCSRKKPRMQQVLDNFFRSHISTDAHSLNSAAQ
b.st WREYKEWASGVRRPD-----
          : * * : * . .

```

**Figure S1.** Sequence alignment of MUTYH and *B. stearothermophilus* MutY. Alignment was performed using Clustal W (1). The ligands of the Zn-binding motif are shown in red.

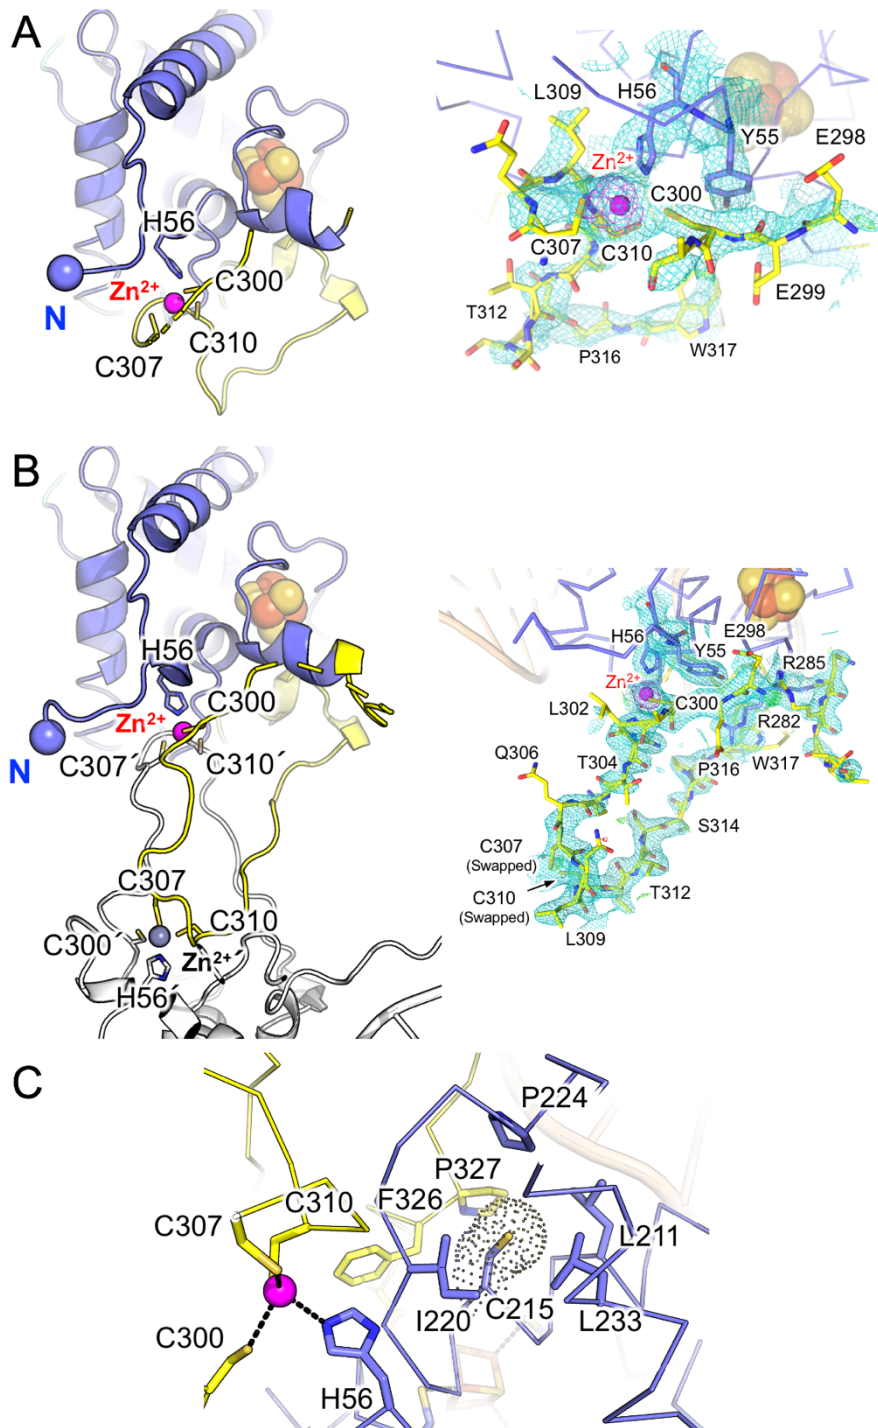

**Figure S2.** Coordination and electron densities of Zn-binding motif. (A) Form I. The  $2F_o - F_c$  map (cyan,  $1.0\sigma$ ), the  $F_o - F_c$  map (green and red,  $\pm 3.5\sigma$ ), and the anomalous difference Fourier map calculated using X-ray with a wavelength of 1 Å (pink,  $3.5\sigma$ ) are shown as meshes. (B) Form II. A neighbouring symmetry mate in Form II is shown in white. (C) Cys215 forms a hydrophobic core close to the Zn-binding motif.

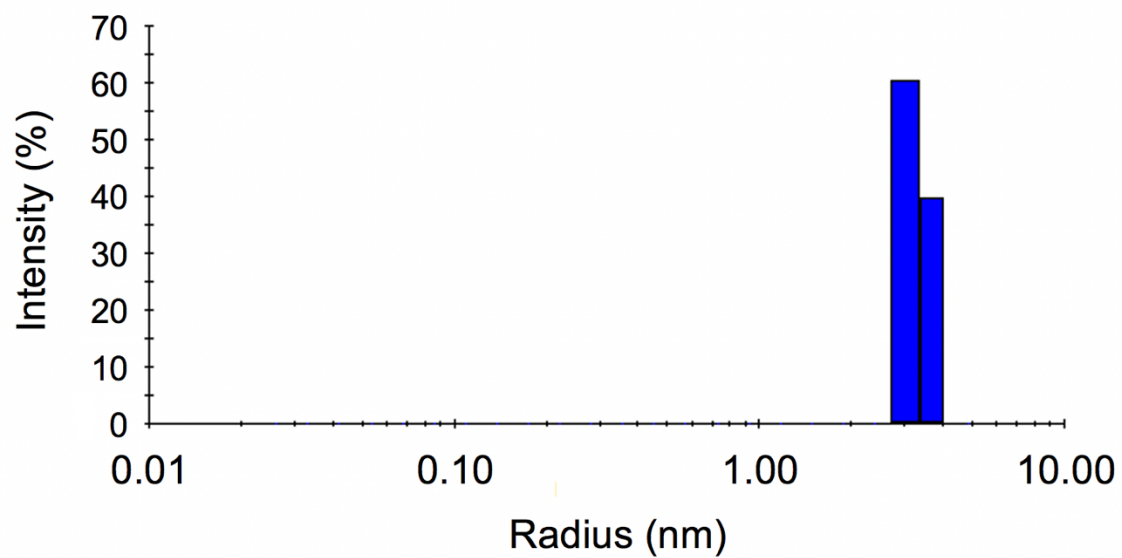

**Figure S3.** Particle size distribution of the MUTYH-DNA complex (1 mg/mL, at 298 K) by DLS analysis. The complex is monodisperse with an intensity of 100 %, a radius of 3.4 nm, and a polydispersity of 11.9%. The estimated molecular mass of the complex by DLS is 57 k.

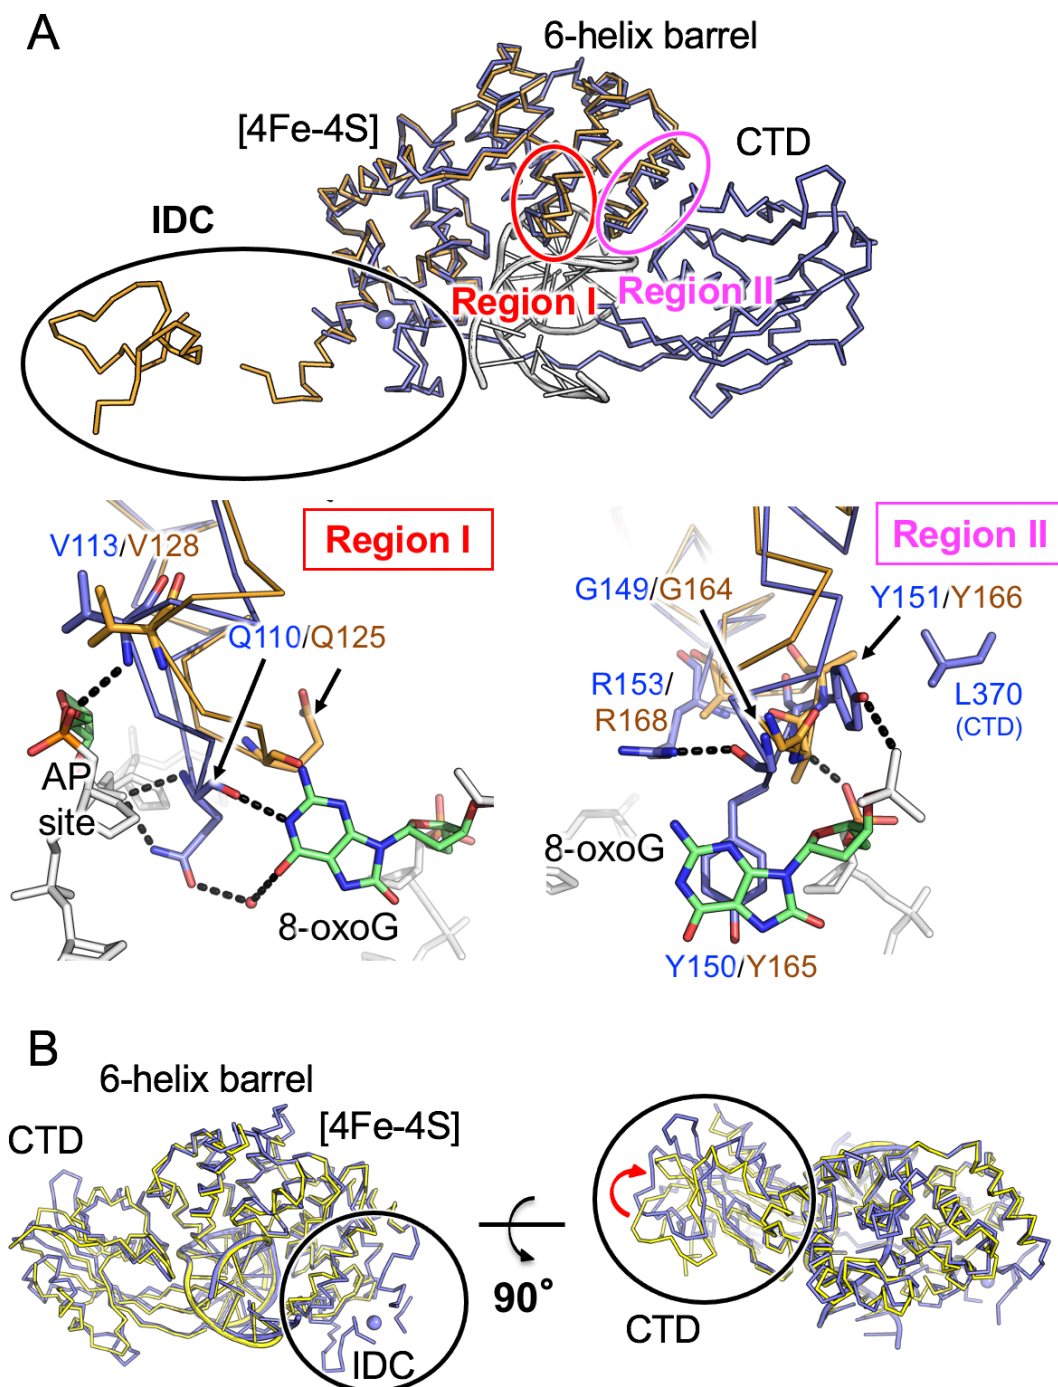

**Figure S4.** Structural comparison of MUTYH and MutY. (A) Structural comparison between the mouse MUTYH-DNA complex (slate and white) and the NTD of human MUTYH (orange, PDB ID: 3N5N). The IDC and DNA binding regions are indicated by circles. (B) Superposition of the MutY-DNA complex (yellow, PDB ID: 3G0Q) onto the mouse MUTYH-DNA complex (slate).

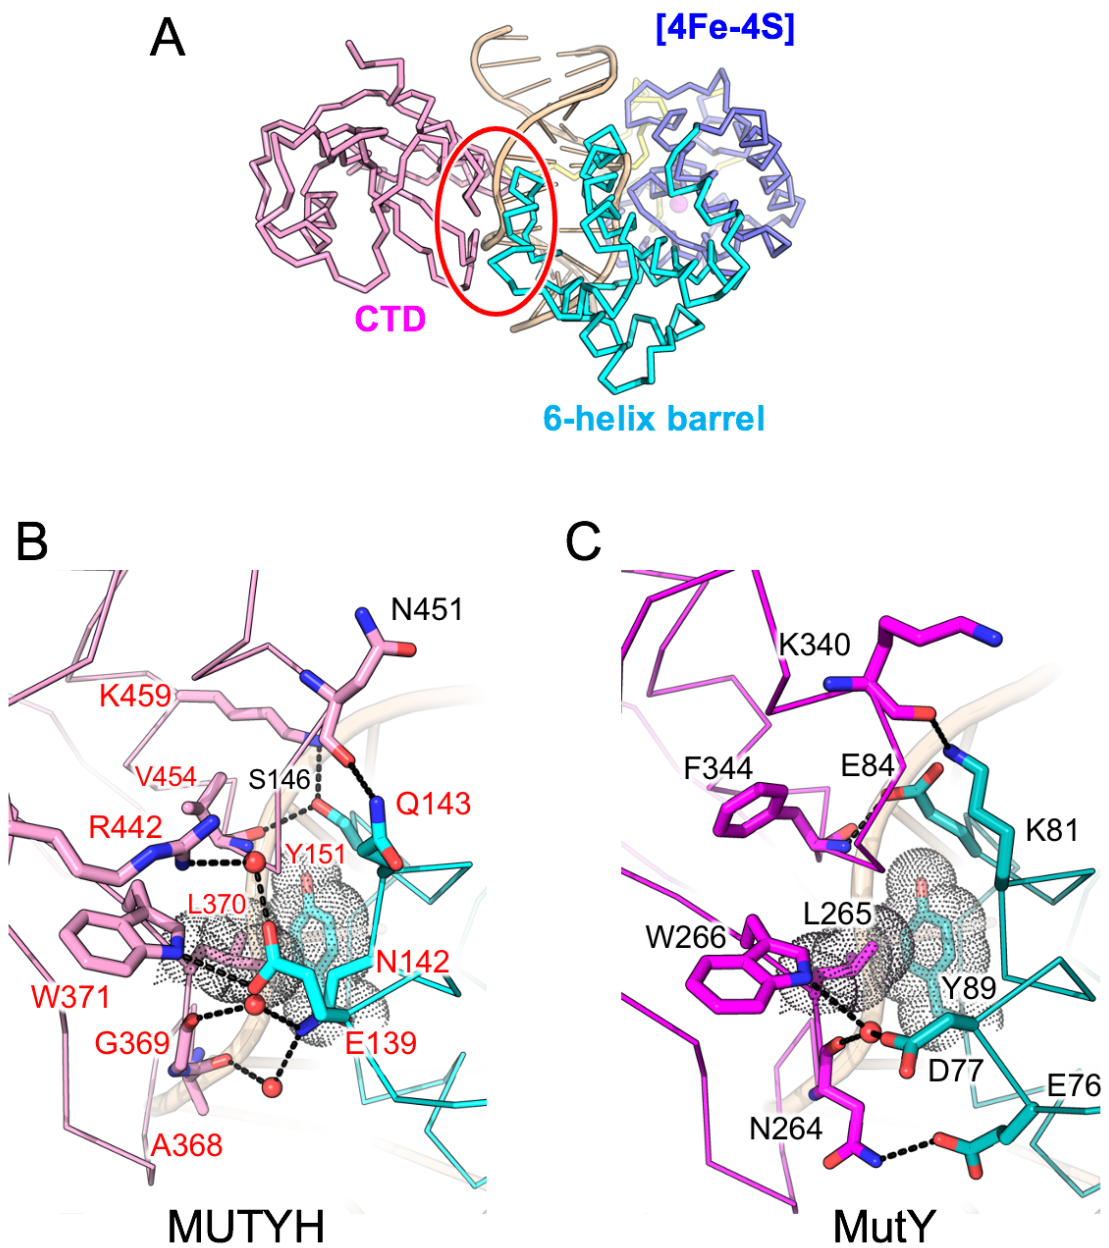

**Figure S5.** Interactions between the six-helix barrel domain and the CTD. (A) Overall view of the MUTYH-DNA complex. The interacting region is indicated by a red circle. (B) Interactions in MUTYH. The conserved residues between mice and humans are labelled in red. (C) Interactions in MutY (PDB ID: 3G0Q).

**A**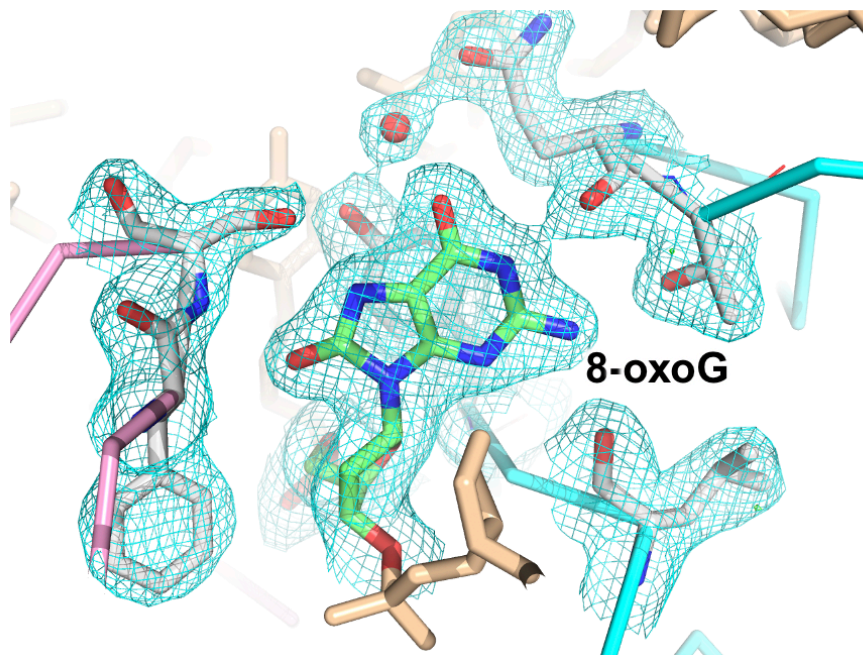**B**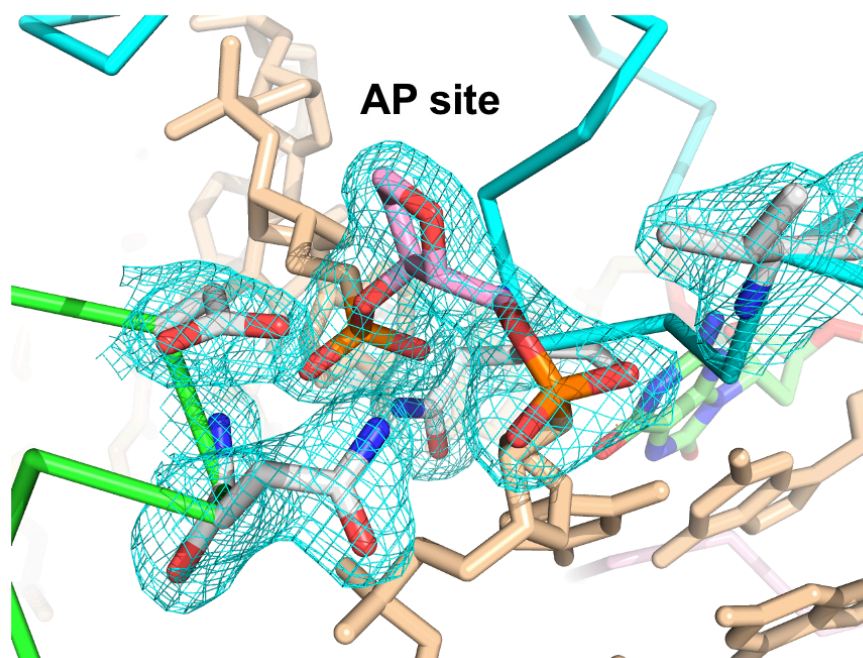

**Figure S6.** Electron densities of 8-oxoG and AP site. (A) 8-OxoG. The  $2F_o - F_c$  map (cyan,  $1.0\sigma$ ) and the  $F_o - F_c$  map (green and red,  $\pm 3.5\sigma$ ) are shown as meshes. (B) AP site.



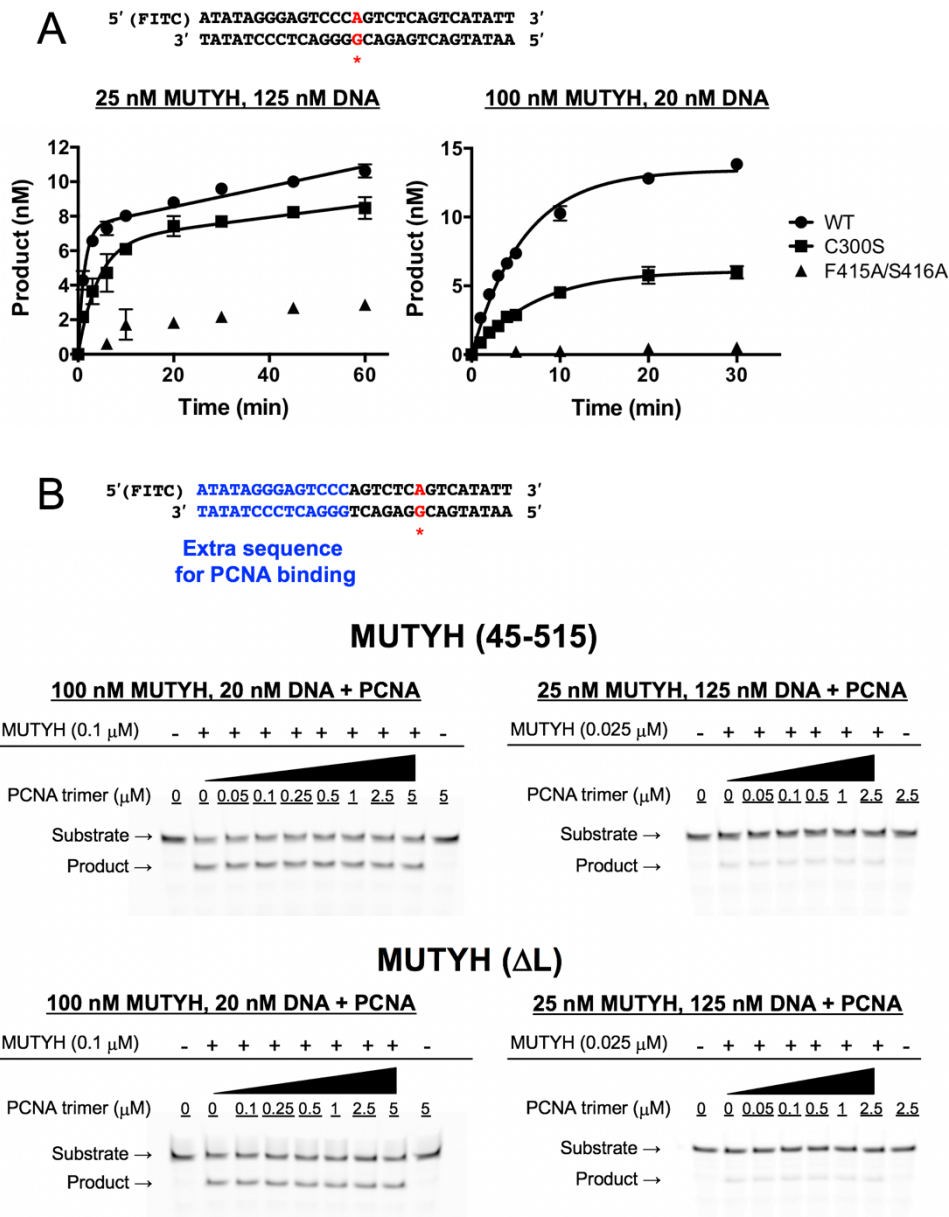

**Figure S7.** Activity measurement of MUTYH. (A) Adenine DNA glycosylase activity of MUTYH (45–487) (wild type, C300S, and F415A/S416A). G\* indicates 8-oxoG. The data represent the mean  $\pm$  SD of three independent experiments. The  $k_2$  values ( $\text{min}^{-1}$ ) of the wildtype and C300S were  $0.17 \pm 0.01$  and  $0.14 \pm 0.01$ , respectively. The  $k_3$  values ( $\text{min}^{-1}$ ) of the wildtype and C300S were  $0.008 \pm 0.002$  and  $0.005 \pm 0.002$ , respectively. The  $k_2$  values of MUTYH (45–487) are lower than those of the full-length MUTYH in the previous report (2). The data of F415S/S416A could not be fitted due to its very weak activity. (B) Adenine DNA glycosylase activity of MUTYH (45–515) (wild type and  $\Delta L$ ) in the presence of PCNA.

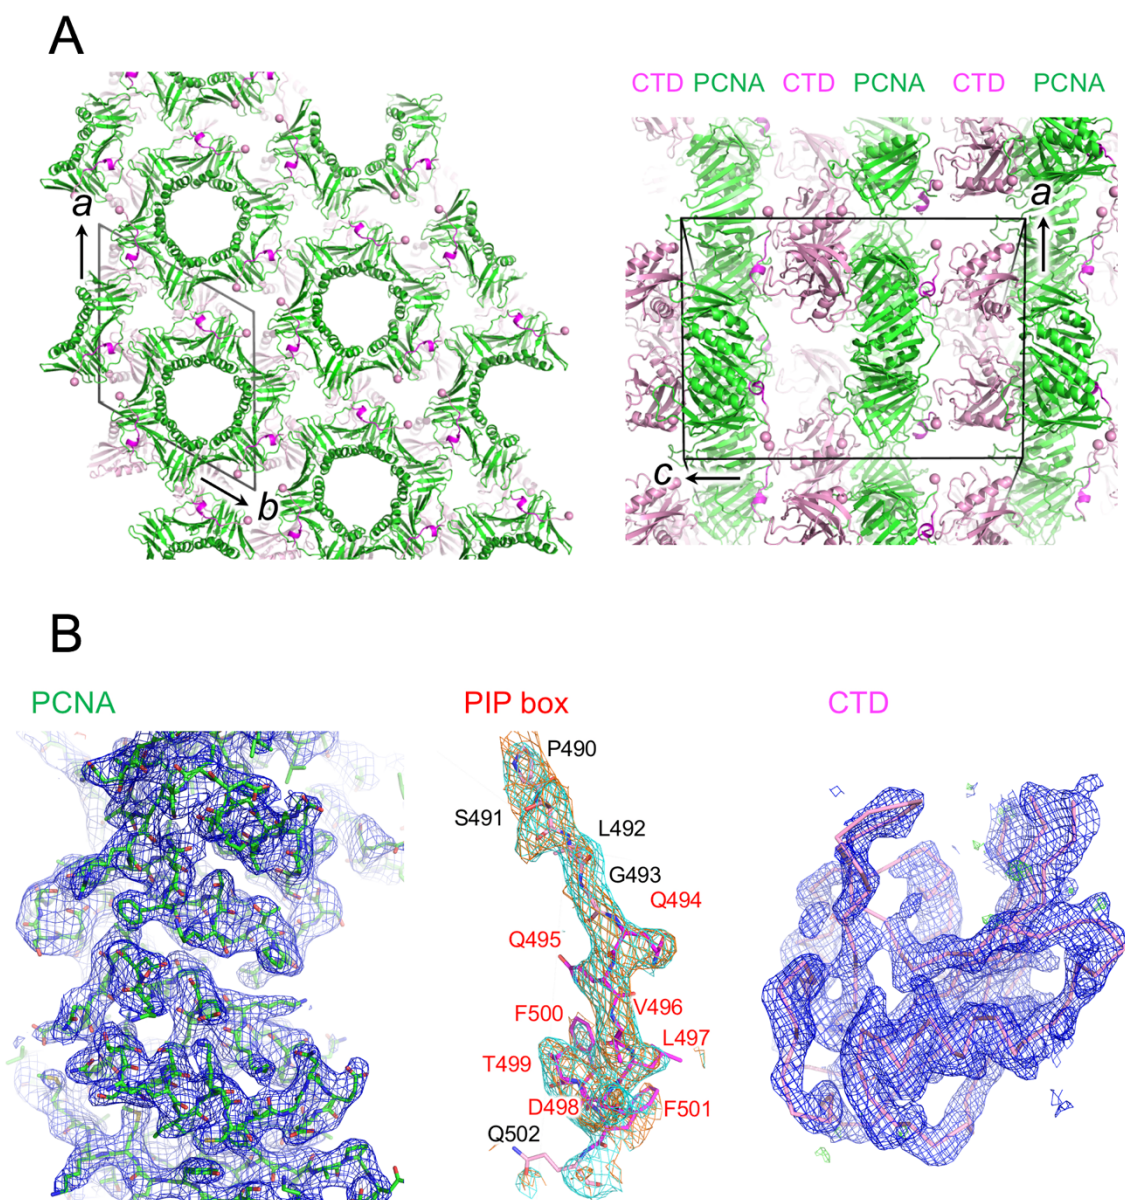

**Figure S8.** Crystal packing and electron densities of CTD-PCNA. (A) Crystal packing of the CTD-PCNA crystal. (B) Electron densities of PCNA, the PIP box, and the CTD. The  $2F_o - F_c$  map (blue or cyan,  $1.0\sigma$ ), the  $F_o - F_c$  map (green and red,  $\pm 3.5\sigma$ ), and the composite omit map with the anneal method (orange,  $1.0\sigma$ ) are shown as meshes.

## References

1. Larkin,M.A., Blackshields,G., Brown,N.P., Chenna,R., McGettigan,P.A., McWilliam,H., Valentin,F., Wallace,I.M., Wilm,A., Lopez,R., *et al.* (2007) Clustal W and Clustal X version 2.0. *Bioinformatics*, **23**, 2947–2948.
2. Engstrom,L.M., Brinkmeyer,M.K., Ha,Y., Raetz,A.G., Hedman,B., Hodgson,K.O., Solomon,E.I. and David,S.S. (2014) A zinc linchpin motif in the MUTYH glycosylase interdomain connector is required for efficient repair of DNA damage. *J. Am. Chem. Soc.*, **136**, 7829–7832.
